# Supplementary material for: Oncolytic adenovirus coexpressing interleukin-12 and shVEGF restores antitumor immune function and enhances antitumor efficacy
Source: PubMed Central journal article supplement (PMC5356712; doi:10.18632/oncotarget.13087), 2016-11-04
Supplement: oncotarget-07-84965-s001.pdf [file oncotarget-07-84965-s001.pdf]

## Oncolytic adenovirus coexpressing interleukin-12 and shVEGF restores antitumor immune function and enhances antitumor efficacy

### SUPPLEMENTARY FIGURES

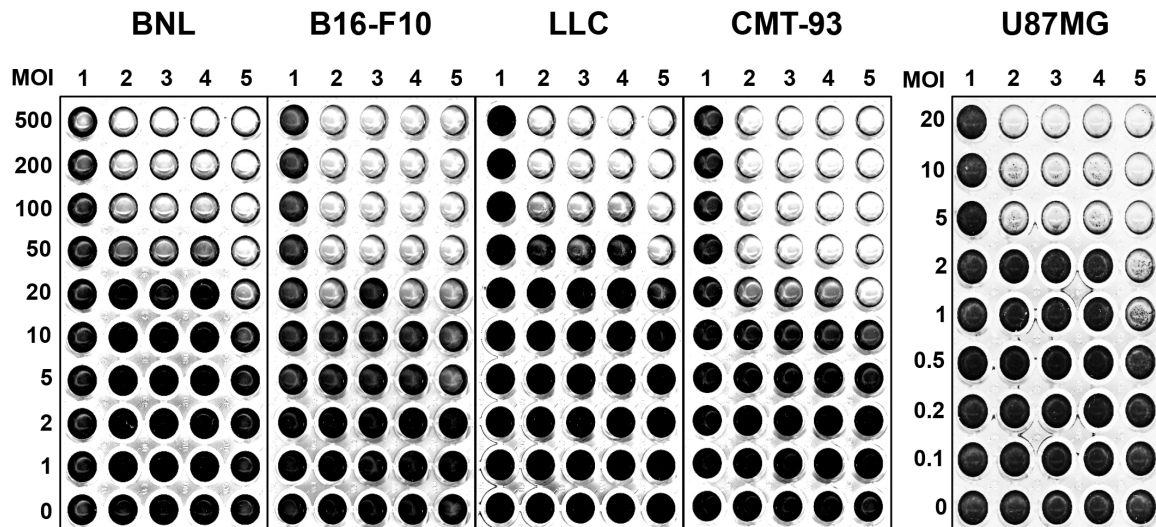

1. Untreated 2. RdB 3. RdB/IL12 4. RdB/shVEGF 5. RdB/IL12/shVEGF

Supplementary Figure S1: Cytopathic effect of oncolytic Ads expressing IL-12 and/or shVEGF in four different murine cancer cell lines: BNL, B16-F10, LLC, and CMT-93, and human cancer cell line: U87MG. Similar results were obtained from at least three separate experiments.

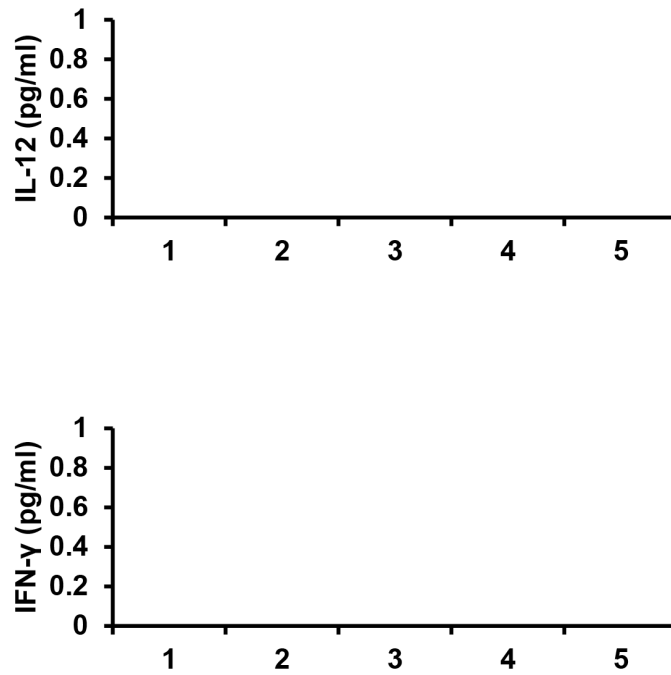

**1. PBS 2. RdB 3. RdB/shVEGF 4. RdB/IL12 5. RdB/IL12/shVEGF**

**Supplementary Figure S2: Oncolytic Ads were injected PBS, RdB ( $3 \times 10^9$  VP), RdB/shVEGF ( $3 \times 10^9$  VP), RdB/IL12 ( $6 \times 10^8$  VP), or RdB/IL12/shVEGF ( $6 \times 10^8$  VP) on days 1, 3 and 5, and serums were collected at day 12 following the initial viral injection, and the level of IL-12 and IFN-γ.**

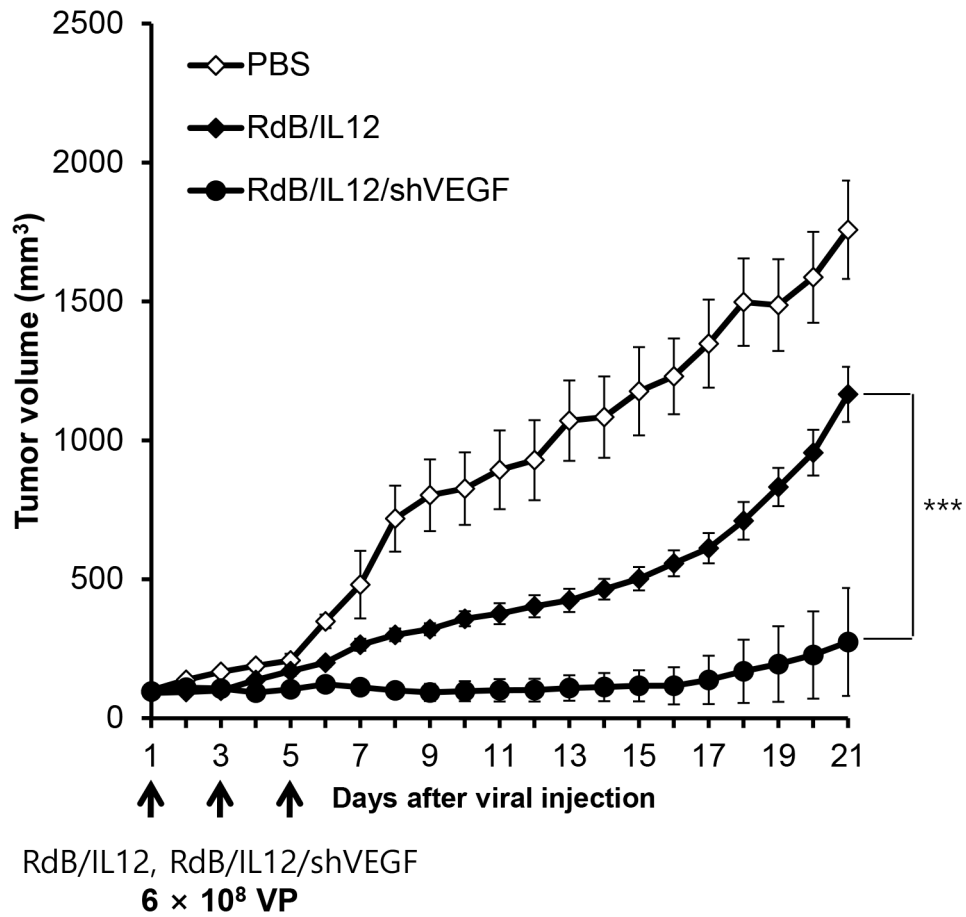

**Supplementary Figure S3: Antitumor effect of oncolytic Ads in RENCA tumor-bearing BALB/C mice (initial tumor volume: 100 mm<sup>3</sup>).** Mice were intratumorally injected with  $6 \times 10^8$  VP of RdB/IL12 (filled diamonds) or RdB/IL12/shVEGF (filled circles), along with PBS as control (open diamonds).

**Normal thymus**

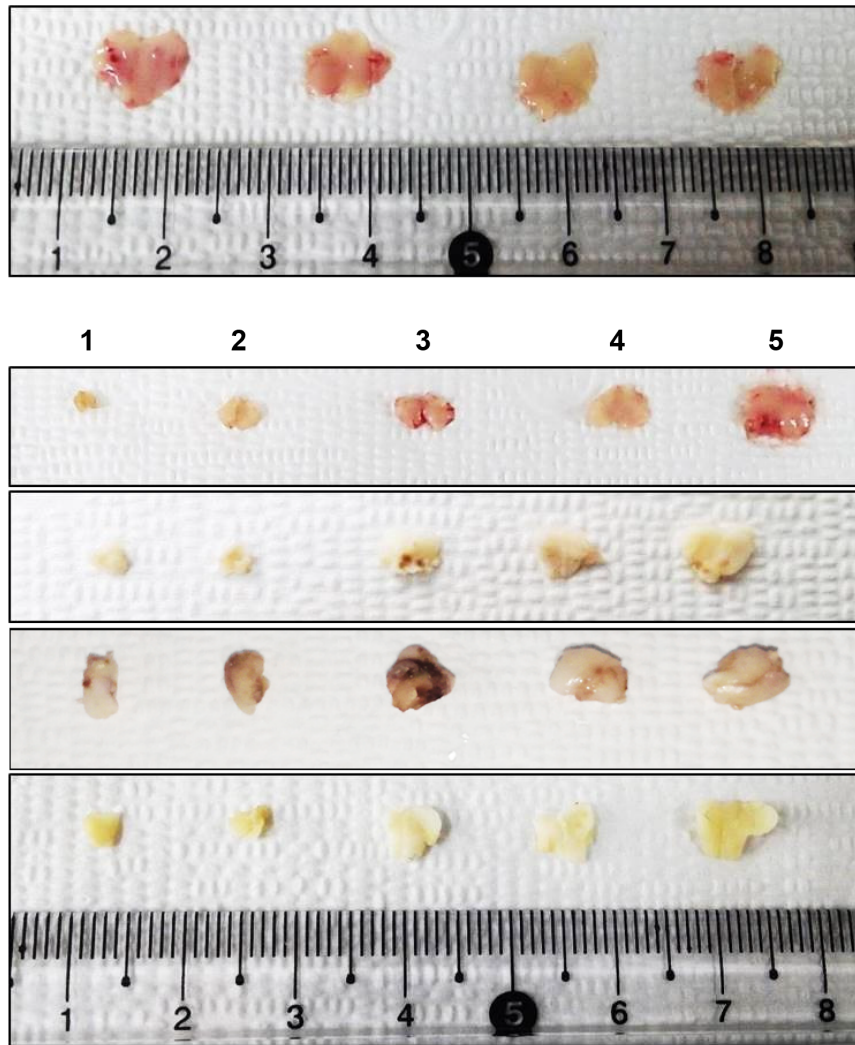

**1. PBS 2. RdB 3. RdB/shVEGF 4. RdB/IL12 5. RdB/IL12/shVEGF**

Supplementary Figure S4: Images of whole thymuses from non-tumor-bearing mice (normal mice) or PBS-, RdB-, RdB/shVEGF-, RdB/IL12-, or RdB/IL12/shVEGF-treated tumor-bearing mice.
